# Supplementary material for: Selection of antimicrobial frog peptides and temporin‐1DRa analogues for treatment of bacterial infections based on their cytotoxicity and differential activity against pathogens
Source: PubMed Central journal article supplement — Chem Biol Drug Des. 2020 Sep 19;96(4):1103–13. doi: 10.1111/cbdd.13569 (PMC7891380; doi:10.1111/cbdd.13569), 2020-09-19
Supplement: CBDD-96-1103-s001.pdf [file CBDD-96-1103-s001.pdf]

1 **Supplemental Information**

2

|                                      | # of antibiotics w/ resistances |      | resistance to % of tested antibiotics |                                     |                            |                                           |                                            |                        |                               |                                  |                                 |  |
|--------------------------------------|---------------------------------|------|---------------------------------------|-------------------------------------|----------------------------|-------------------------------------------|--------------------------------------------|------------------------|-------------------------------|----------------------------------|---------------------------------|--|
|                                      |                                 |      | inhibits cell wall synthesis          | inhibits cell wall synthesis (murA) | inhibits protein synthesis | inhibits protein synthesis/ RNA synthesis | interferes with DNA replication and repair | inhibits RNA synthesis | inhibits folic acid synthesis | disrupts bacterial cell membrane | damages DNA, ribosomal proteins |  |
| <i>Lb plantarum</i> WCFS1            | 7                               | 41.2 | 3                                     |                                     | 2                          |                                           | 1                                          | 1                      |                               |                                  |                                 |  |
| <i>Lb rhamnosus</i> LGG              |                                 |      |                                       |                                     |                            |                                           |                                            |                        |                               |                                  | 10                              |  |
| <i>Lb salivarius</i> DSM20554        |                                 |      |                                       |                                     |                            |                                           |                                            |                        |                               |                                  |                                 |  |
| <i>Lb casei</i> R0215                | 6                               | 42.9 | 2                                     |                                     | 4                          |                                           |                                            |                        |                               |                                  |                                 |  |
| <i>Lb johnsonii</i> LC-1 Nestle      |                                 |      |                                       |                                     |                            |                                           |                                            |                        |                               |                                  | 11                              |  |
| <i>Lb reuteri</i> ATCC55730          |                                 |      |                                       |                                     |                            |                                           |                                            |                        |                               |                                  |                                 |  |
| <i>Lb acidophilus</i> LA5            |                                 |      |                                       |                                     |                            |                                           |                                            |                        |                               |                                  | 12                              |  |
| <i>Lb salivarius</i> FortaFit Ls-33  |                                 |      |                                       |                                     |                            |                                           |                                            |                        |                               |                                  |                                 |  |
| <i>Lb casei</i> Shirota              |                                 |      |                                       |                                     |                            |                                           |                                            |                        |                               |                                  |                                 |  |
| <i>S. suis</i> S10                   | 2                               | 10.5 |                                       | 1                                   | 1                          |                                           |                                            |                        |                               |                                  | 13                              |  |
| <i>S. aureus</i> DMS20231            | 0                               | 0    |                                       |                                     |                            |                                           |                                            |                        |                               |                                  |                                 |  |
| <i>S. pseudintermedius</i> E138      | 4                               | 21.1 | 1                                     |                                     | 3                          |                                           |                                            |                        |                               |                                  | 14                              |  |
| <i>S. pseudintermedius</i> E139      | 3                               | 15.8 | 1                                     |                                     | 1                          |                                           |                                            |                        | 1                             |                                  |                                 |  |
| <i>S. pseudintermedius</i> E140      | 10                              | 52.6 | 2                                     | 1                                   | 5                          |                                           | 1                                          |                        | 1                             |                                  | 15                              |  |
| <i>S. pseudintermedius</i> S70E2     | 6                               | 31.6 | 1                                     |                                     | 5                          |                                           |                                            |                        |                               |                                  |                                 |  |
| <i>S. pseudintermedius</i> S70E8     | 2                               | 10.5 | 1                                     |                                     | 1                          |                                           |                                            |                        |                               |                                  | 16                              |  |
| <i>S. pseudintermedius</i> S70F3     | 1                               | 50   |                                       |                                     | 1                          |                                           |                                            |                        |                               |                                  |                                 |  |
| <i>P. aeruginosa</i> 26228           | 0                               | 0    |                                       |                                     |                            |                                           |                                            |                        |                               |                                  |                                 |  |
| <i>P. aeruginosa</i> 25467           | 0                               | 0    |                                       |                                     |                            |                                           |                                            |                        |                               |                                  | 17                              |  |
| <i>P. aeruginosa</i> Sens1 PA01      | 0                               | 0    |                                       |                                     |                            |                                           |                                            |                        |                               |                                  |                                 |  |
| <i>P. aeruginosa</i> Sens2 ATCC27853 | 0                               | 0    |                                       |                                     |                            |                                           |                                            |                        |                               |                                  |                                 |  |
| <i>P. aeruginosa</i> MDR1 B38084     | 7                               | 87.5 | 3                                     |                                     | 2                          |                                           | 1                                          |                        | 1                             |                                  | 18                              |  |
| <i>P. aeruginosa</i> MDR2 B31770     | 6                               | 75   | 4                                     |                                     | 1                          |                                           |                                            |                        | 1                             |                                  |                                 |  |
| <i>E. faecium</i> Sens S1            | 0                               | 0    |                                       |                                     |                            |                                           |                                            |                        |                               |                                  | 19                              |  |
| <i>E. faecium</i> Sens S2            | 5                               | 27.8 | 2                                     |                                     | 2                          |                                           |                                            |                        | 1                             |                                  |                                 |  |
| <i>E. faecium</i> VanA R39           | 4                               | 57.1 | 2                                     |                                     | 1                          |                                           |                                            |                        |                               |                                  | 1                               |  |
| <i>E. faecium</i> VanB R44           | 4                               | 57.1 | 2                                     |                                     | 1                          |                                           |                                            |                        |                               |                                  | 1                               |  |
| <i>S. aureus</i> Sens 8325.4         | 0                               | 0    |                                       |                                     |                            |                                           |                                            |                        |                               |                                  | 21                              |  |
| <i>S. aureus</i> MRSA B33424         | 9                               | 81.8 | 1                                     |                                     | 6                          |                                           | 1                                          | 1                      |                               |                                  |                                 |  |
| <i>A. baumannii</i> MDR Bangl 027    | 16                              | 84.2 | 11                                    |                                     | 2                          |                                           | 2                                          | 1                      |                               |                                  |                                 |  |

22 **Supplemental Table 1.** VITEK antibiotic resistance profile for bacteria used in this study. The  
 23 number of antibiotics for which each tested bacterial strain was classified as resistant based on  
 24 the detected MIC value and clinical breakpoints are listed and colored from highest (red) to  
 25 lowest (blue) number of antibiotic resistances. Additionally, the general mode of action of the  
 26 corresponding antibiotics to which resistance was observed are listed.



| Strain                               | Temporin 1DRa |     | Lys-5 Temporin 1DRa |     | Lys-4 Temporin 1DRa |     | Lys-5 Temporin 1DRa-Lys-8 Temporin 1DRa |     | MB-8 Temporin 1DRa |     | MB-9 Temporin 1DRa |     | MB-10 Temporin 1DRa |     | MB-13 Temporin 1DRa |     | DMB-7 Temporin 1DRa |     | TM-7 Temporin 1DRa |     |
|--------------------------------------|---------------|-----|---------------------|-----|---------------------|-----|-----------------------------------------|-----|--------------------|-----|--------------------|-----|---------------------|-----|---------------------|-----|---------------------|-----|--------------------|-----|
|                                      | MIC           | MCB | MIC                 | MCB | MIC                 | MCB | MIC                                     | MCB | MIC                | MCB | MIC                | MCB | MIC                 | MCB | MIC                 | MCB | MIC                 | MCB | MIC                | MCB |
| <i>L. plantarum</i> WCFS1            | 64            | >64 | 32                  | >64 | 64                  | >64 | >64                                     | >64 | 32                 | >64 | 64                 | >64 | >64                 | >64 | >64                 | >64 | >64                 | >64 | >64                | >64 |
| <i>L. pharosaurus</i> LG6            | 32            | 64  | 32                  | >64 | >64                 | >64 | >64                                     | >64 | 32                 | 64  | 64                 | >64 | >64                 | >64 | >64                 | >64 | >64                 | >64 | >64                | >64 |
| <i>L. salinus</i> DSM20854           | 64            | 64  | 64                  | 64  | >64                 | >64 | >64                                     | >64 | 32                 | >64 | >64                | >64 | >64                 | >64 | >64                 | >64 | >64                 | >64 | >64                | >64 |
| <i>L. solivivus</i> TonnHIT15-39     | 64            | 64  | 64                  | >64 | >64                 | >64 | >64                                     | >64 | 32                 | >64 | >64                | >64 | >64                 | >64 | >64                 | >64 | >64                 | >64 | >64                | >64 |
| <i>L. casei</i> ROZ15                | 64            | 64  | 32                  | >64 | 32                  | >64 | >64                                     | >64 | 32                 | >64 | 64                 | >64 | >64                 | >64 | >64                 | >64 | >64                 | >64 | >64                | >64 |
| <i>L. casei</i> Shiota               | 32            | 64  | 16                  | 64  | 16                  | 32  | >64                                     | >64 | 32                 | >64 | 64                 | >64 | >64                 | >64 | >64                 | >64 | >64                 | >64 | >64                | >64 |
| <i>L. johnsonii</i> LC-1             | >64           | >64 | 32                  | >64 | >64                 | >64 | >64                                     | >64 | 32                 | >64 | >64                | >64 | >64                 | >64 | >64                 | >64 | >64                 | >64 | >64                | >64 |
| <i>L. reuteri</i> ATCC55730          | 32            | 64  | 32                  | >64 | 32                  | >64 | >64                                     | >64 | 32                 | >64 | 64                 | >64 | >64                 | >64 | >64                 | >64 | >64                 | >64 | >64                | >64 |
| <i>L. acidophilus</i> LA5            | 64            | >64 | 64                  | >64 | 64                  | >64 | >64                                     | >64 | 32                 | >64 | >64                | >64 | >64                 | >64 | >64                 | >64 | >64                 | >64 | >64                | >64 |
| <i>S. aureus</i> DSM20231            | 8             | 16  | 4                   | 32  | 32                  | >64 | >64                                     | >64 | 32                 | 64  | 16                 | 32  | 64                  | 16  | 32                  | 64  | 16                  | 32  | 64                 | 16  |
| <i>S. aureus</i> Sens 8235.4         | 8             | 16  | 4                   | 8   | 8                   | 16  | 64                                      | 4   | 8                  | 8   | 8                  | 8   | 8                   | 8   | 8                   | 8   | 8                   | 8   | 8                  | 8   |
| <i>S. aureus</i> MRSA B39424         | 8             | 32  | 8                   | 8   | 16                  | 16  | 64                                      | 8   | 32                 | 4   | 16                 | 8   | 8                   | 16  | 16                  | 64  | 32                  | 16  | 32                 | 16  |
| <i>S. pseudintermedius</i> E138      | 8             | 16  | 8                   | 8   | 16                  | 32  | 64                                      | 8   | 32                 | 4   | 8                  | 4   | 8                   | 16  | 4                   | 8   | 8                   | 8   | 8                  | 8   |
| <i>S. pseudintermedius</i> E140      | 8             | 32  | 8                   | 16  | 8                   | 16  | 32                                      | >64 | 8                  | 16  | 8                  | 16  | 8                   | 16  | 8                   | 32  | 16                  | 64  | 16                 | 32  |
| <i>S. pseudintermedius</i> S70E2     | 8             | 16  | 8                   | 8   | 16                  | 16  | 64                                      | 8   | 32                 | 4   | 8                  | 4   | 16                  | 4   | 16                  | 4   | 8                   | 64  | 16                 | 64  |
| <i>S. pseudintermedius</i> S70E8     | >64           | >64 | 64                  | 64  | 32                  | >64 | >64                                     | >64 | 64                 | >64 | >64                | >64 | >64                 | >64 | >64                 | >64 | 64                  | 64  | 64                 | >64 |
| <i>S. pseudintermedius</i> S70F3     | >64           | >64 | >64                 | >64 | >64                 | >64 | >64                                     | >64 | >64                | >64 | >64                | >64 | >64                 | >64 | >64                 | >64 | 64                  | 64  | 64                 | >64 |
| <i>P. aeruginosa</i> 26228           | 64            | >64 | >64                 | >64 | >64                 | >64 | >64                                     | >64 | >64                | >64 | >64                | >64 | >64                 | >64 | >64                 | >64 | >64                 | >64 | >64                | >64 |
| <i>P. aeruginosa</i> 25467           | 64            | >64 | >64                 | >64 | >64                 | >64 | >64                                     | >64 | >64                | >64 | >64                | >64 | >64                 | >64 | >64                 | >64 | >64                 | >64 | >64                | >64 |
| <i>P. aeruginosa</i> Sens3 PA01      | >64           | >64 | >64                 | >64 | >64                 | >64 | >64                                     | >64 | >64                | >64 | >64                | >64 | >64                 | >64 | >64                 | >64 | >64                 | >64 | >64                | >64 |
| <i>P. aeruginosa</i> Sens2 ATCC27853 | 16            | 16  | 16                  | 16  | 16                  | 32  | 64                                      | 64  | 64                 | 64  | 64                 | 64  | 64                  | 32  | 32                  | 64  | 64                  | 64  | 64                 | 64  |
| <i>P. aeruginosa</i> MDR1 B36894     | 8             | 16  | 8                   | 8   | 16                  | 16  | 32                                      | 32  | 32                 | 32  | 32                 | 32  | 32                  | 32  | 32                  | 64  | 64                  | 64  | 64                 | 64  |
| <i>P. aeruginosa</i> MDR2 B31770     | 8             | 8   | 8                   | 8   | 16                  | 16  | 32                                      | 32  | 32                 | 32  | 32                 | 32  | 32                  | 32  | 32                  | 64  | 64                  | 64  | 64                 | 64  |
| <i>E. faecium</i> Sens 51            | 8             | 16  | 8                   | 8   | 16                  | 16  | 32                                      | >64 | >64                | >64 | >64                | >64 | >64                 | >64 | >64                 | >64 | >64                 | >64 | >64                | >64 |
| <i>E. faecium</i> Sens 52            | 8             | 8   | 8                   | 8   | 16                  | 16  | 32                                      | >64 | >64                | >64 | >64                | >64 | >64                 | >64 | >64                 | >64 | >64                 | >64 | >64                | >64 |
| <i>E. faecium</i> VanA R39           | 8             | 8   | 8                   | 8   | 16                  | 16  | 32                                      | 64  | 64                 | 2   | 4                  | 4   | 4                   | 4   | 4                   | 8   | 16                  | 16  | 32                 | 16  |
| <i>E. faecium</i> VanB R44           | 8             | 16  | 16                  | 16  | 32                  | 32  | 64                                      | >64 | >64                | 8   | 8                  | 8   | 8                   | 8   | 8                   | 16  | 16                  | 32  | 32                 | 16  |
| <i>A. baumannii</i> MDR Bangl 027    | 16            | 16  | 16                  | 16  | 32                  | 32  | 64                                      | >64 | >64                | 32  | 32                 | 32  | 32                  | 32  | 32                  | 64  | 64                  | 64  | 64                 | 64  |

Supplemental Table 3. MIC and MBC values of temporin-1DRa analogues against a panel of bacteria, as determined by micro broth dilution assay. Experiments were performed in duplicate, average values are shown. MIC and MBC values are highlighted following a color gradient from the highest tested concentration (red) to the lowest value observed (green) to increase legibility.
